# Supplementary material for: What is in a name? Comparing diagnostic criteria for chronic fatigue syndrome with or without fibromyalgia
Source: Springer Nature journal article supplement (doi:10.1007/s10067-014-2793-x), 2014-10-13
Supplement: 10067_2014_2793_MOESM1_ESM.docx [file 10067_2014_2793_MOESM1_ESM.docx]

**Online supplement1: Contrasting diagnostic criteria (on top of the 1994 CFS criteria)**

| **Outcome measure** | | **Canadian**  **n=24** | **Non-Canadian**  **n=24** | **ME**  **n=10** | **Non-ME**  **n=38** |
| --- | --- | --- | --- | --- | --- |
| **SF-36** | **Total Physical score (on 400)** | 123.75 ± 45 | 130.46 ± 48 | 128.74 ± 48 | 120.90 ± 38 |
| **Total Mental score (on 400)** | 195.34 ±61 | 194.99 ± 61 | 194.60 ± 75 | 197.33 ± 61 |
| **Total score (on 800)** | 319.09 ± 89 | 323.95 ± 118 | 323.33 ± 109 | 314.63 ± 85 |
| **Symptom list CFS (VAS in mm)** | **Pain** | 49.61 ± 26 | 40.33 ± 24 | 47.46 ± 26 | 35.50 ± 25 |
| **Fatigue** | 70.75 ± 22 | 59.92 ± 25 | 65.87 ± 23 | 63.30 ± 27 |
| **Headache** | 30.67 ± 31 | 21.65 ± 29 | 30.34 ± 32 | 10.25 ± 13 |
| **Sore throat** | 14.35 ± 22 | 23.33 ± 29 | 21.86 ± 28 | 7.40 ± 8 |
| **Post-exertional fatigue** | 75.10 ± 18 | 63.67 ± 22 | 70.26 ± 20 | 66.05 ± 24 |
| **Attention deficits** | 64.81 ± 19 | 48.88 ± 31 | 57.93 ± 26 | 52.70 ± 29 |
| **Memory problems** | 58.75 ± 24 | 47.13 ± 28 | 55.00 ± 24 | 45.10 ± 34 |
| **Difficulties calculating** | 50.71 ± 29 | 45.96 ± 30 | 49.50 ± 26 | 43.90 ± 38 |
| **Difficulties finding words** | 53.92 ± 22 | 48.42 ± 26 | 52.61 ± 23 | 45.70 ± 27 |
| **Personality disorders** | 25.67 ± 26 | 31.92 ± 33 | 30.20 ± 30 | 23.45 ± 32 |
| **Mood swings** | 29.21 ± 25 | 40.96 ± 32 | 35.42 ± 29 | 33.80 ± 30 |
| **Non-restoring sleep** | 84.23 ± 10 | 76.73 ± 26 | 79.53 ± 21 | 84.10 ± 16 |
| **Sleeping problems** | 73.58 ± 26 | 68.31 ± 32 | 73.96 ± 27 | 59.50 ± 34 |
| **Muscle weakness** | 65.85 ± 20 | 60.29 ± 28 | 64.87 ± 22 | 56.25 ± 30 |
| **Cold hands and feet** | 56.94 ± 33 | 41.54 ± 36 | 49.53 ± 35 | 48.15 ± 36 |
| **Flue like symptoms** | 52.44 ± 27 | 40.75 ± 32 | 45.63 ± 30 | 50.25 ± 30 |
| **Gastro-intestinal complaints** | 55.48 ± 28 | 42.00 ± 31 | 48.72 ± 29 | 48.80 ± 34 |
| **Dyspnea** | 63.73 ± 30 | 49.98 ± 29 | 59.67 ± 29 | 46.15 ± 31 |
| **Hypersensitivity light** | 59.23 ± 28 | 48.79 ± 30 | 55.58 ± 30 | 48.05 ± 26 |
| **CIS** | **Fatigue** | 51.63 ± 5 | 48.42 ± 7 | 49.26 ± 6 | 52.90 ± 5 |
| **Concentration** | 29.29 ± 4 | 26.00 ± 7 | 27.95 ± 6 | 26.50 ± 9 |
| **Motivation** | 13.92 ± 7 | 14.04 ± 6 | 13.68 ± 6 | 15.10 ± 5 |
| **Activity** | 15.13 ± 5 | 14.29 ± 4 | 14.47 ± 5 | 15.60 ± 4 |
| **Psychological correlates** | **Hypervigilance (PVAQ)** | 36.83 ± 12 | 39.85 ± 13 | 39.16 ± 11 | 35.25 ± 18 |
| **Depression (BDI-PC)** | 2.96 ± 3 | 4.13 ± 4 | 3.47 ± 3 | 3.80 ± 8 |
| **Kinesiophobia (TSK-CFS)** | 38.21 ± 8 | 40.33 ± 8 | 37.82 ± 7 | 44.80 ± 9 |
| **ICQ helplessness** | 16.21 ± 4 | 16.17 ± 3 | 15.55 ± 4 | 18.60 ± 3 |
| **ICQ acceptance** | 12.92 ± 4 | 14.63 ± 4 | 13.50 ± 5 | 14.80 ± 3 |
| **ICQ disease benefits** | 14.42 ± 5 | 15.08 ± 5 | 15.00 ± 5 | 13.80 ± 4 |

Scores in the grey zones are those that are significantly different between the FM versus non-FM CFS patients.

(CFS = Chronic Fatigue Syndrome; FM = Fibromyalgia, CON = healthy subjects, MS = Multiple Sclerosis; SF-36 = Short Form 36 Health Survey; CIS = Checklist Individual Strength; ICQ = Illness Cognitions Questionnaire ).
